# Supplementary material for: Simple Sequence Repeat (SSR) Genetic Linkage Map of D Genome Diploid Cotton Derived from an Interspecific Cross between Gossypium davidsonii and Gossypium klotzschianum
Source: MDPI journal article supplement (doi:10.3390/ijms19010204), 2018-01-11

P.MAP-(Chr01)

|            |          |
|------------|----------|
| 614083.5   | SWU10021 |
| 1833164.4  | SWU10061 |
| 2148685.5  | SWU10070 |
| 2591762.0  | SWU10077 |
| 4786627.0  | SWU10119 |
| 4788225.0  | SWU10120 |
| 4971021.5  | SWU10126 |
| 5909642.5  | SWU10152 |
| 6922163.0  | SWU10178 |
| 6943041.5  | SWU10179 |
| 6950167.0  | SWU10180 |
| 7301122.5  | SWU10187 |
| 7695419.0  | SWU10196 |
| 9543666.0  | SWU10231 |
| 9768658.0  | SWU10238 |
| 9813940.0  | SWU10239 |
| 10197900.0 | SWU10249 |
| 10508534.0 | SWU10253 |
| 10731548.0 | SWU10256 |
| 10753962.0 | SWU10256 |
| 11923624.0 | SWU10271 |
| 11993530.0 | SWU10272 |
| 12033693.0 | SWU10273 |
| 13414394.0 | SWU10289 |
| 13510706.0 | SWU10290 |
| 13804861.0 | SWU10299 |
| 13809203.0 | SWU10300 |
| 14624328.0 | SWU10311 |
| 15831202.0 | SWU10338 |
| 15887859.0 | SWU10339 |
| 15996014.0 | SWU10341 |
| 16602184.0 | SWU10352 |
| 16605558.0 | SWU10353 |
| 17214640.0 | SWU10369 |
| 17709502.0 | SWU10373 |
| 17714844.0 | SWU10374 |
| 17825178.0 | SWU10376 |
| 17839708.0 | SWU10377 |
| 17894020.0 | SWU10378 |
| 18378648.0 | SWU10388 |
| 19458816.0 | SWU10404 |
| 20389762.0 | SWU10418 |
| 20621806.0 | SWU10422 |
| 21452318.0 | SWU10431 |
| 22198872.0 | SWU10440 |
| 22981948.0 | SWU10445 |
| 24030310.0 | SWU10450 |
| 24514280.0 | SWU10455 |
| 24622730.0 | SWU10457 |
| 24751856.0 | SWU10461 |
| 25428344.0 | SWU10473 |
| 27417588.0 | SWU10502 |
| 28081532.0 | SWU10511 |
| 28659276.0 | SWU10521 |
| 28905270.0 | SWU10523 |
| 29120486.0 | SWU10525 |
| 29582320.0 | SWU10534 |
| 29667404.0 | SWU10536 |
| 29669148.0 | SWU10537 |
| 29820516.0 | SWU10539 |
| 30105212.0 | SWU10544 |
| 30273760.0 | SWU10546 |
| 32092784.0 | SWU10565 |
| 34572600.0 | SWU10594 |
| 38211568.0 | SWU10615 |
| 39053840.0 | SWU10623 |
| 39707468.0 | SWU10631 |
| 40367932.0 | SWU10644 |
| 41621748.0 | SWU10654 |
| 42232876.0 | SWU10660 |
| 42260960.0 | SWU10661 |
| 42342080.0 | SWU10662 |
| 42380040.0 | SWU10663 |
| 42507484.0 | SWU10667 |
| 43104304.0 | SWU10678 |
| 44190192.0 | SWU10695 |
| 44836288.0 | SWU10703 |
| 45504772.0 | SWU10718 |
| 45669456.0 | SWU10722 |
| 45899804.0 | SWU10727 |
| 45949176.0 | SWU10730 |
| 46412600.0 | SWU10736 |
| 46812056.0 | SWU10745 |
| 47146344.0 | SWU10753 |
| 47210448.0 | SWU10755 |
| 47936924.0 | SWU10773 |
| 48768192.0 | SWU10789 |
| 52391260.0 | SWU10819 |
| 52625176.0 | SWU10833 |
| 53393576.0 | SWU10846 |
| 53894092.0 | SWU10857 |
| 54560712.0 | SWU10872 |
| 54924440.0 | SWU10883 |

P.MAP-(Chr02)

|            |           |
|------------|-----------|
| 2420910.5  | SWU10960  |
| 3099180.0  | SWU10971  |
| 3416452.0  | SWU10977  |
| 7427202.5  | SWU11038  |
| 7527015.0  | SWU11040  |
| 7906442.5  | SWU11052  |
| 8650378.0  | SWU11062  |
| 10457639.0 | SWU11096  |
| 10724200.0 | SWU11097  |
| 10533363.0 | SWU11104  |
| 11188954.0 | SWU11104  |
| 11181416.0 | SWU11111  |
| 11188954.0 | SWU11112  |
| 11630612.0 | SWU11125  |
| 12114236.0 | SWU11136  |
| 12142598.0 | SWU11141  |
| 12421021.0 | SWU21069b |
| 13004444.0 | SWU11155  |
| 13132616.0 | SWU11159  |
| 13511222.0 | SWU11162  |
| 13999549.0 | SWU11169  |
| 15289331.0 | SWU11188  |
| 16131699.0 | SWU10021  |
| 17599096.0 | SWU11239  |
| 18247924.0 | SWU11246  |
| 18465936.0 | SWU11247  |
| 18467016.0 | SWU11248  |
| 19127344.0 | SWU11256  |
| 20048908.0 | SWU11269  |
| 20786016.0 | SWU11277  |
| 21125698.0 | SWU11283  |
| 23277066.0 | SWU11305  |
| 23313908.0 | SWU11307  |
| 24897562.0 | SWU11322  |
| 26850038.0 | SWU11337  |
| 27713232.0 | SWU11350  |
| 29415904.0 | SWU11368  |
| 29648308.0 | SWU11370  |
| 33727396.0 | SWU11391  |
| 37425676.0 | SWU11419  |
| 58333260.0 | SWU11675  |
| 58676992.0 | SWU11687  |
| 58990376.0 | SWU11697  |
| 59112052.0 | SWU11703  |
| 59279884.0 | SWU11705  |
| 59562280.0 | SWU11709  |
| 59692760.0 | SWU11714  |
| 60528184.0 | SWU11735  |
| 61873940.0 | SWU11788  |
| 62327508.0 | SWU11803  |
| 62362664.0 | SWU11805  |

P.MAP-(Chr03)

|            |          |
|------------|----------|
| 42902.5    | SWU11824 |
| 110239.5   | SWU11836 |
| 148834.5   | SWU11840 |
| 391114.5   | SWU11862 |
| 457473.5   | SWU11863 |
| 466994.0   | SWU11863 |
| 497954.0   | SWU11866 |
| 575615.5   | SWU11872 |
| 775838.5   | SWU11894 |
| 980288.5   | SWU11901 |
| 1144711.5  | SWU11916 |
| 1798043.0  | SWU11950 |
| 2836406.5  | SWU11993 |
| 4188431.5  | SWU12044 |
| 4329976.0  | SWU12050 |
| 6330730.5  | SWU12101 |
| 10031590.0 | SWU12187 |
| 12961578.0 | SWU12248 |
| 15483587.0 | SWU12289 |
| 16974332.0 | SWU12309 |
| 17165144.0 | SWU12315 |
| 21077670.0 | SWU12406 |
| 23322196.0 | SWU12443 |
| 2408094.0  | SWU12449 |
| 24080912.0 | SWU19467 |
| 26944324.0 | SWU12476 |
| 37687060.0 | SWU12492 |
| 30575478.0 | SWU12524 |
| 33414668.0 | SWU12583 |
| 34017212.0 | SWU12598 |
| 34251416.0 | SWU12605 |
| 35832968.0 | SWU12637 |
| 37687060.0 | SWU12680 |
| 37714148.0 | SWU12682 |
| 38826004.0 | SWU12710 |
| 39888660.0 | SWU12739 |
| 39905592.0 | SWU12740 |
| 40283956.0 | SWU12751 |
| 40924768.0 | SWU12776 |
| 42329560.0 | SWU12839 |
| 42471756.0 | SWU19467 |
| 43056000.0 | SWU12868 |
| 43353072.0 | SWU12881 |
| 43514056.0 | SWU12888 |

P.MAP-(Chr04)

|            |          |
|------------|----------|
| 2807857.5  | SWU13039 |
| 2933935.5  | SWU13047 |
| 3088689.0  | SWU13052 |
| 4145470.0  | SWU13087 |
| 4180846.5  | SWU13089 |
| 4494220.0  | SWU13095 |
| 4507956.0  | SWU13095 |
| 4899867.0  | SWU13105 |
| 7281691.0  | SWU13160 |
| 9164114.0  | SWU13191 |
| 9510442.0  | SWU13197 |
| 11698674.0 | SWU13217 |
| 28514852.0 | SWU13336 |
| 32504804.0 | SWU13367 |
| 33279564.0 | SWU13374 |
| 34312616.0 | SWU13382 |
| 36635184.0 | SWU13409 |
| 36764096.0 | SWU13411 |
| 36932724.0 | SWU13414 |
| 37341256.0 | SWU13418 |
| 37445004.0 | SWU13421 |
| 38405816.0 | SWU13425 |
| 38644244.0 | SWU13428 |
| 38647864.0 | SWU13429 |
| 38873616.0 | SWU13432 |
| 39359648.0 | SWU13442 |
| 41621748.0 | SWU10654 |
| 42690588.0 | SWU20886 |
| 43294784.0 | SWU13503 |
| 43846676.0 | SWU13513 |
| 46691740.0 | SWU13558 |
| 47377488.0 | SWU13568 |
| 47477724.0 | SWU13570 |
| 49862640.0 | SWU13620 |
| 50164456.0 | SWU13628 |
| 50249348.0 | SWU13630 |
| 50999676.0 | SWU13648 |
| 52405204.0 | SWU13664 |
| 52702760.0 | SWU13666 |
| 53894092.0 | SWU10857 |
| 54154088.0 | SWU13690 |
| 54285024.0 | SWU13694 |
| 54792168.0 | SWU13704 |
| 55318136.0 | SWU13716 |
| 55544776.0 | SWU13720 |
| 55776872.0 | SWU13731 |
| 56126612.0 | SWU13739 |
| 56392696.0 | SWU13744 |
| 56502540.0 | SWU13749 |
| 56947848.0 | SWU13759 |
| 57959208.0 | SWU13787 |
| 59058036.0 | SWU13807 |
| 59512884.0 | SWU13820 |
| 59770360.0 | SWU13826 |
| 59963560.0 | SWU13831 |
| 60123532.0 | SWU13834 |
| 60353844.0 | SWU13841 |
| 60439860.0 | SWU13844 |

|             |          |
|-------------|----------|
| 464684.0    | SWU15645 |
| 584465.5    | SWU15648 |
| 614083.5    | SWU10021 |
| 629471.0    | SWU15666 |
| 2276919.5   | SWU15686 |
| 745494.0    | SWU15698 |
| 0025306.0   | SWU15706 |
| 5564892.0   | SWU15725 |
| 429452.5    | SWU15750 |
| 5050706.0   | SWU15753 |
| 930646.0    | SWU15766 |
| 006061475.0 | SWU15790 |
| 0284595.0   | SWU15796 |
| 5591673.0   | SWU15800 |
| 8855327.0   | SWU15807 |
| 7341025.5   | SWU15816 |
| 0321340.0   | SWU15885 |
| 3323485.0   | SWU10256 |
| 4838587.0   | SWU12289 |
| 1313699.0   | SWU10021 |
| 0011780.0   | SWU16050 |
| 812096.0    | SWU16150 |
| 3831280.0   | SWU16151 |
| 5737450.0   | SWU16158 |
| 971050.0    | SWU16177 |
| 00606452.0  | SWU16186 |
| 4115904.0   | SWU11368 |
| 6648308.0   | SWU13707 |
| 1310938.0   | SWU16200 |
| 383772.0    | SWU10021 |
| 411636.0    | SWU16222 |
| 5540196.0   | SWU16232 |
| 0063400.0   | SWU16262 |
| 198852.0    | SWU20886 |
| 7756728.0   | SWU12682 |
| 021056.0    | SWU16337 |
| 10101673.0  | SWU16357 |
| 43433508.0  | SWU16362 |
| 724696.0    | SWU16366 |
| 8222340.0   | SWU16368 |
| 596600.0    | SWU16379 |
| 669848.0    | SWU16380 |
| 024652.0    | SWU16390 |
| 2235888.0   | SWU16393 |
| 1916988.0   | SWU16412 |
| 4111416.0   | SWU16417 |
| 4335248.0   | SWU16418 |
| 8784832.0   | SWU16439 |
| 819216.0    | SWU16455 |
| 9606716.0   | SWU16462 |
| 103184.0    | SWU16465 |
| 3326500.0   | SWU16491 |
| 33771156.0  | SWU16491 |
| 47476664.0  | SWU16495 |
| 3384116.0   | SWU16507 |
| 6699188.0   | SWU16516 |
| 5560488.0   | SWU16528 |
| 96967372.0  | SWU16532 |
| 5548940.0   | SWU16540 |
| 380300.0    | SWU16551 |
| 4030604.0   | SWU16552 |
| 7773704.0   | SWU16562 |
| 6665480.0   | SWU16586 |
| 888585.0    | SWU16589 |
| 1113800.0   | SWU16599 |
| 1117368.0   | SWU16600 |
| 1442252.0   | SWU16602 |
| 1412024.0   | SWU16606 |
| 50505492.0  | SWU16610 |
| 70707648.0  | SWU16612 |
| 2228556.0   | SWU16626 |
| 30303848.0  | SWU16629 |
| 36369432.0  | SWU16633 |
| 1614176.0   | SWU16640 |
| 6868552.0   | SWU16643 |
| 2832200.0   | SWU16645 |
| 8608856.0   | SWU16651 |

|            |           |
|------------|-----------|
| 540893.5   | SSWU14759 |
| 944930.5   | SWU14768  |
| 1175829.5  | SWU14772  |
| 2086916.4  | SWU14795  |
| 2130887.0  | SWU14796  |
| 3864331.3  | SWU14825  |
| 4260590.5  | SWU14833  |
| 4599826.0  | SWU14837  |
| 4890497.5  | SWU14837  |
| 5227933.5  | SWU14837  |
| 13297020.0 | SWU14844  |
| 17289650.0 | SWU14958  |
| 17487730.0 | SWU14998  |
| 19092944.0 | SWU15000  |
| 20713674.0 | SWU15007  |
| 23423530.0 | SWU15029  |
| 29774732.0 | SWU15058  |
| 30635290.0 | SWU15109  |
| 30760870.0 | SWU15123  |
| 30830224.0 | SWU15124  |
| 31048476.0 | SWU15128  |
| 31190292.0 | SWU15131  |
| 31329460.0 | SWU15133  |
| 32057670.0 | SWU15140  |
| 32092784.0 | SWU15149  |
| 32328262.0 | SWU15065  |
| 32638228.0 | SWU15158  |
| 32947684.0 | SWU15162  |
| 33483324.0 | SWU15172  |
| 34406432.0 | SWU15179  |
| 35645968.0 | SWU15205  |
| 35651492.0 | SWU15222  |
| 35859184.0 | SWU15223  |
| 35904904.0 | SWU15228  |
| 35936932.0 | SWU15229  |
| 36409808.0 | SWU15230  |
| 36753868.0 | SWU16393  |
| 36941072.0 | SWU15247  |
| 37077188.0 | SWU15249  |
| 37414032.0 | SWU15256  |
| 37714148.0 | SWU15263  |
| 38083272.0 | SWU12682  |
| 38212676.0 | SWU15274  |
| 38622232.0 | SWU15277  |
| 38639084.0 | SWU15289  |
| 39797328.0 | SWU15291  |
| 40803944.0 | SWU15325  |
| 42502928.0 | SWU15357  |
| 43264408.0 | SWU15398  |
| 44377408.0 | SWU15420  |
| 45147668.0 | SWU15455  |
| 46593368.0 | SWU15474  |
| 46682300.0 | SWU15504  |
| 47278124.0 | SWU15511  |
| 47493416.0 | SWU15529  |
| 48214892.0 | SWU15536  |
| 49288896.0 | SWU15553  |
| 49313840.0 | SWU15587  |
| 49339232.0 | SWU15588  |
|            | SWU15591  |

|            |           |
|------------|-----------|
| 89122.0    | SWU13891  |
| 112420.0   | SWU13893  |
| 162675.0   | SWU13896  |
| 776410.5   | SWU13905  |
| 1220441.0  | SWU13914  |
| 1750748.4  | SWU13931  |
| 2237665.0  | SWU13936  |
| 4470265.5  | SWU13995  |
| 4962513.5  | SWU14003  |
| 5283752.0  | SWU14010  |
| 5790839.5  | SWU14016  |
| 7026131.0  | SWU14030  |
| 7137470.5  | SWU14033  |
| 8380673.0  | SWU14049  |
| 9316402.0  | SWU14061  |
| 9322254.0  | SWU14062  |
| 14917830.0 | SWU14144  |
| 16774728.0 | SWU14166  |
| 19207512.0 | SWU14186  |
| 20081172.0 | SWU14195  |
| 20972956.0 | SWU14200  |
| 22133376.0 | SWU14216  |
| 39191836.0 | SWU14384  |
| 41891200.0 | SWU14410  |
| 43462660.0 | SWU14431  |
| 47210448.0 | SWU140755 |
| 47380760.0 | SWU14475  |
| 50667292.0 | SWU14516  |
| 53756488.0 | SWU14552  |
| 54397428.0 | SWU14565  |
| 55529708.0 | SWU14578  |
| 56336320.0 | SWU14587  |
| 59717332.0 | SWU14639  |
| 59930496.0 | SWU14643  |
| 60047768.0 | SWU14647  |
| 60920776.0 | SWU14662  |
| 61502580.0 | SWU14676  |
| 61618456.0 | SWU14679  |
| 61624472.0 | SWU14680  |
| 61970536.0 | SWU14688  |
| 62071700.0 | SWU14692  |
| 62226336.0 | SWU14696  |
| 62232632.0 | SWU14696  |
| 62354264.0 | SWU14699  |
| 62577928.0 | SWU21785  |
| 62579584.0 | SWU14708  |
| 62627400.0 | SWU14711  |
| 62664032.0 | SWU14712  |
| 62664184.0 | SWU14713  |
| 63577708.0 | SWU14736  |

|            |          |
|------------|----------|
| 75365.0    | SWU16654 |
| 1051992.0  | SWU16684 |
| 3416452.0  | SWU10977 |
| 5707944.5  | SWU16779 |
| 6685476.5  | SWU16794 |
| 6989846.5  | SWU16795 |
| 7173139.0  | SWU16798 |
| 7324345.5  | SWU16802 |
| 7543474.5  | SWU16808 |
| 8080896.0  | SWU16818 |
| 9962382.0  | SWU16842 |
| 10366454.0 | SWU16847 |
| 11710244.0 | SWU16868 |
| 13580178.0 | SWU16891 |
| 14438667.0 | SWU16900 |
| 14470806.0 | SWU16901 |
| 14869990.0 | SWU16907 |
| 15372306.0 | SWU16912 |
| 15808840.0 | SWU16918 |
| 16953576.0 | SWU16929 |
| 24709886.0 | SWU17006 |
| 26186136.0 | SWU17012 |
| 33450326.0 | SWU17082 |
| 34057064.0 | SWU17093 |
| 34763936.0 | SWU17106 |
| 36123120.0 | SWU17126 |
| 36971532.0 | SWU17144 |
| 37157684.0 | SWU17148 |
| 37878136.0 | SWU17157 |
| 38399944.0 | SWU17172 |
| 40849608.0 | SWU17226 |
| 41173516.0 | SWU16808 |
| 41579324.0 | SWU17240 |
| 41701404.0 | SWU17242 |
| 41720708.0 | SWU17243 |
| 42171564.0 | SWU17259 |
| 42800996.0 | SWU17272 |
| 43514056.0 | SWU12888 |
| 47447576.0 | SWU17365 |
| 47558472.0 | SWU17369 |
| 49516680.0 | SWU17419 |
| 49874832.0 | SWU16423 |
| 50109532.0 | SWU17431 |
| 50203236.0 | SWU17434 |
| 50882040.0 | SWU17457 |
| 50999676.0 | SWU13648 |
| 53200348.0 | SWU17520 |
| 53329968.0 | SWU17524 |
| 54737656.0 | SWU17561 |
| 55960524.0 | SWU17600 |
| 56572440.0 | SWU17614 |
| 60614176.0 | SWU16640 |



P.MAP-(Chr09)

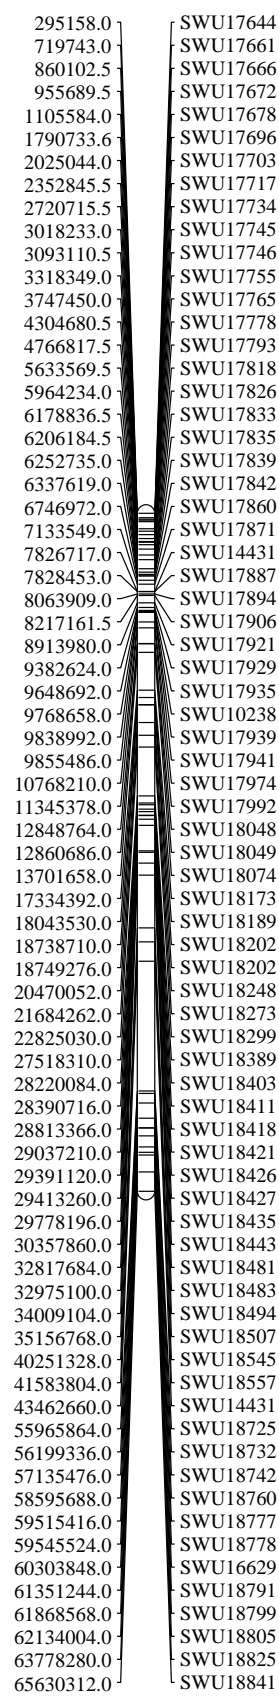

P.MAP-(Chr11)

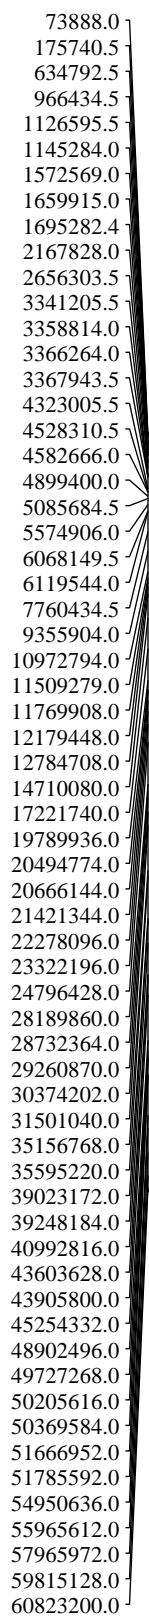

P.MAP-(Chr12)

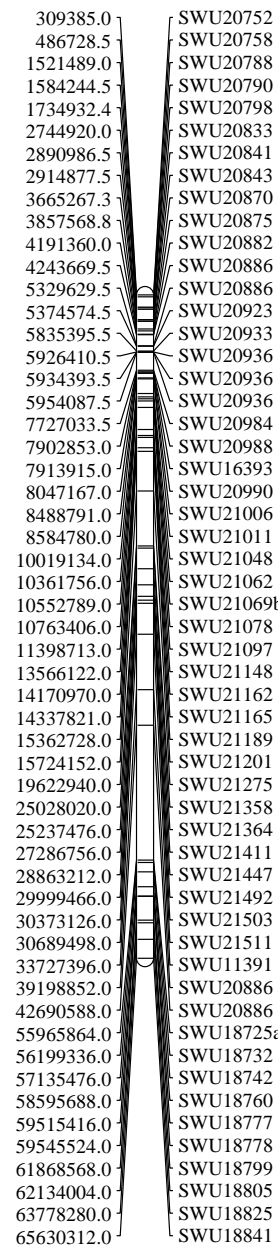

P.MAP-(Chr10)

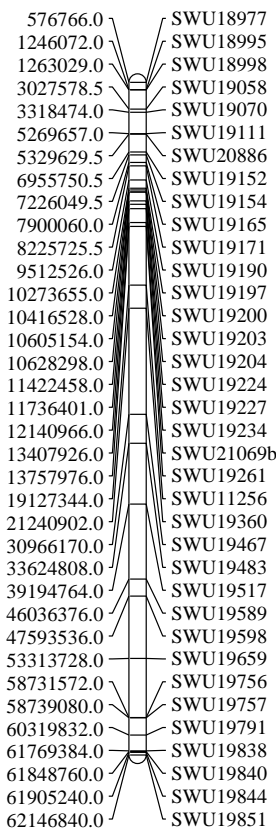

P.MAP-(Chr13)

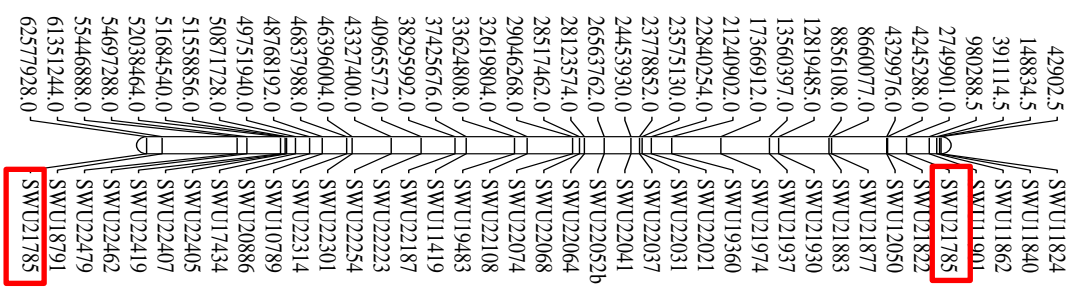

Supplement: s1 [file s1]
