# Supplementary figures and images for: Simple Sequence Repeat (SSR) Genetic Linkage Map of D Genome Diploid Cotton Derived from an Interspecific Cross between Gossypium davidsonii and Gossypium klotzschianum
Source: MDPI journal article supplement (doi:10.3390/ijms19010204), 2018-01-11

CHR01

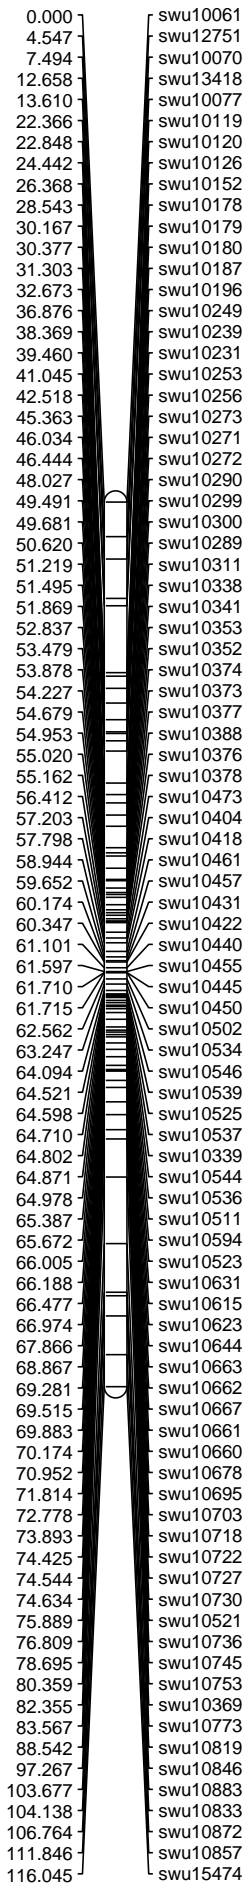

CHR02

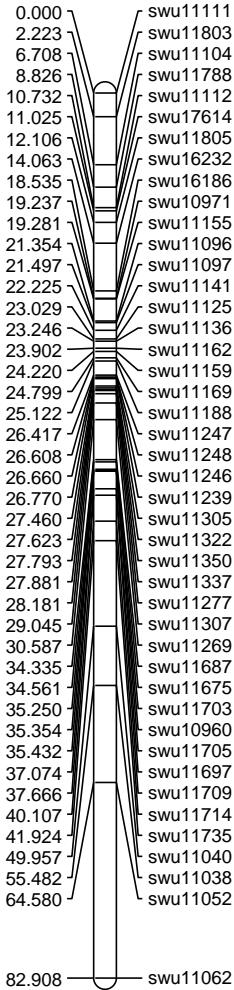

CHR03

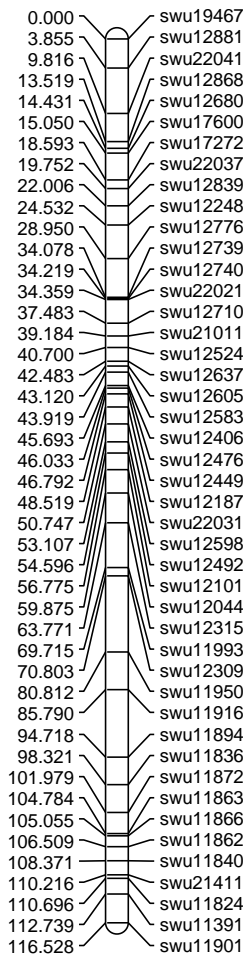

CHR04

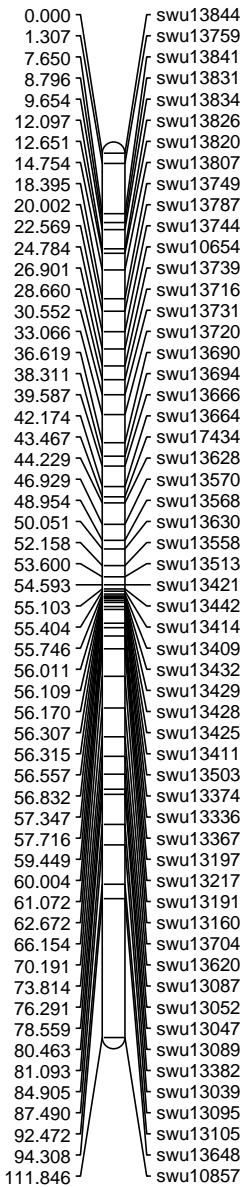

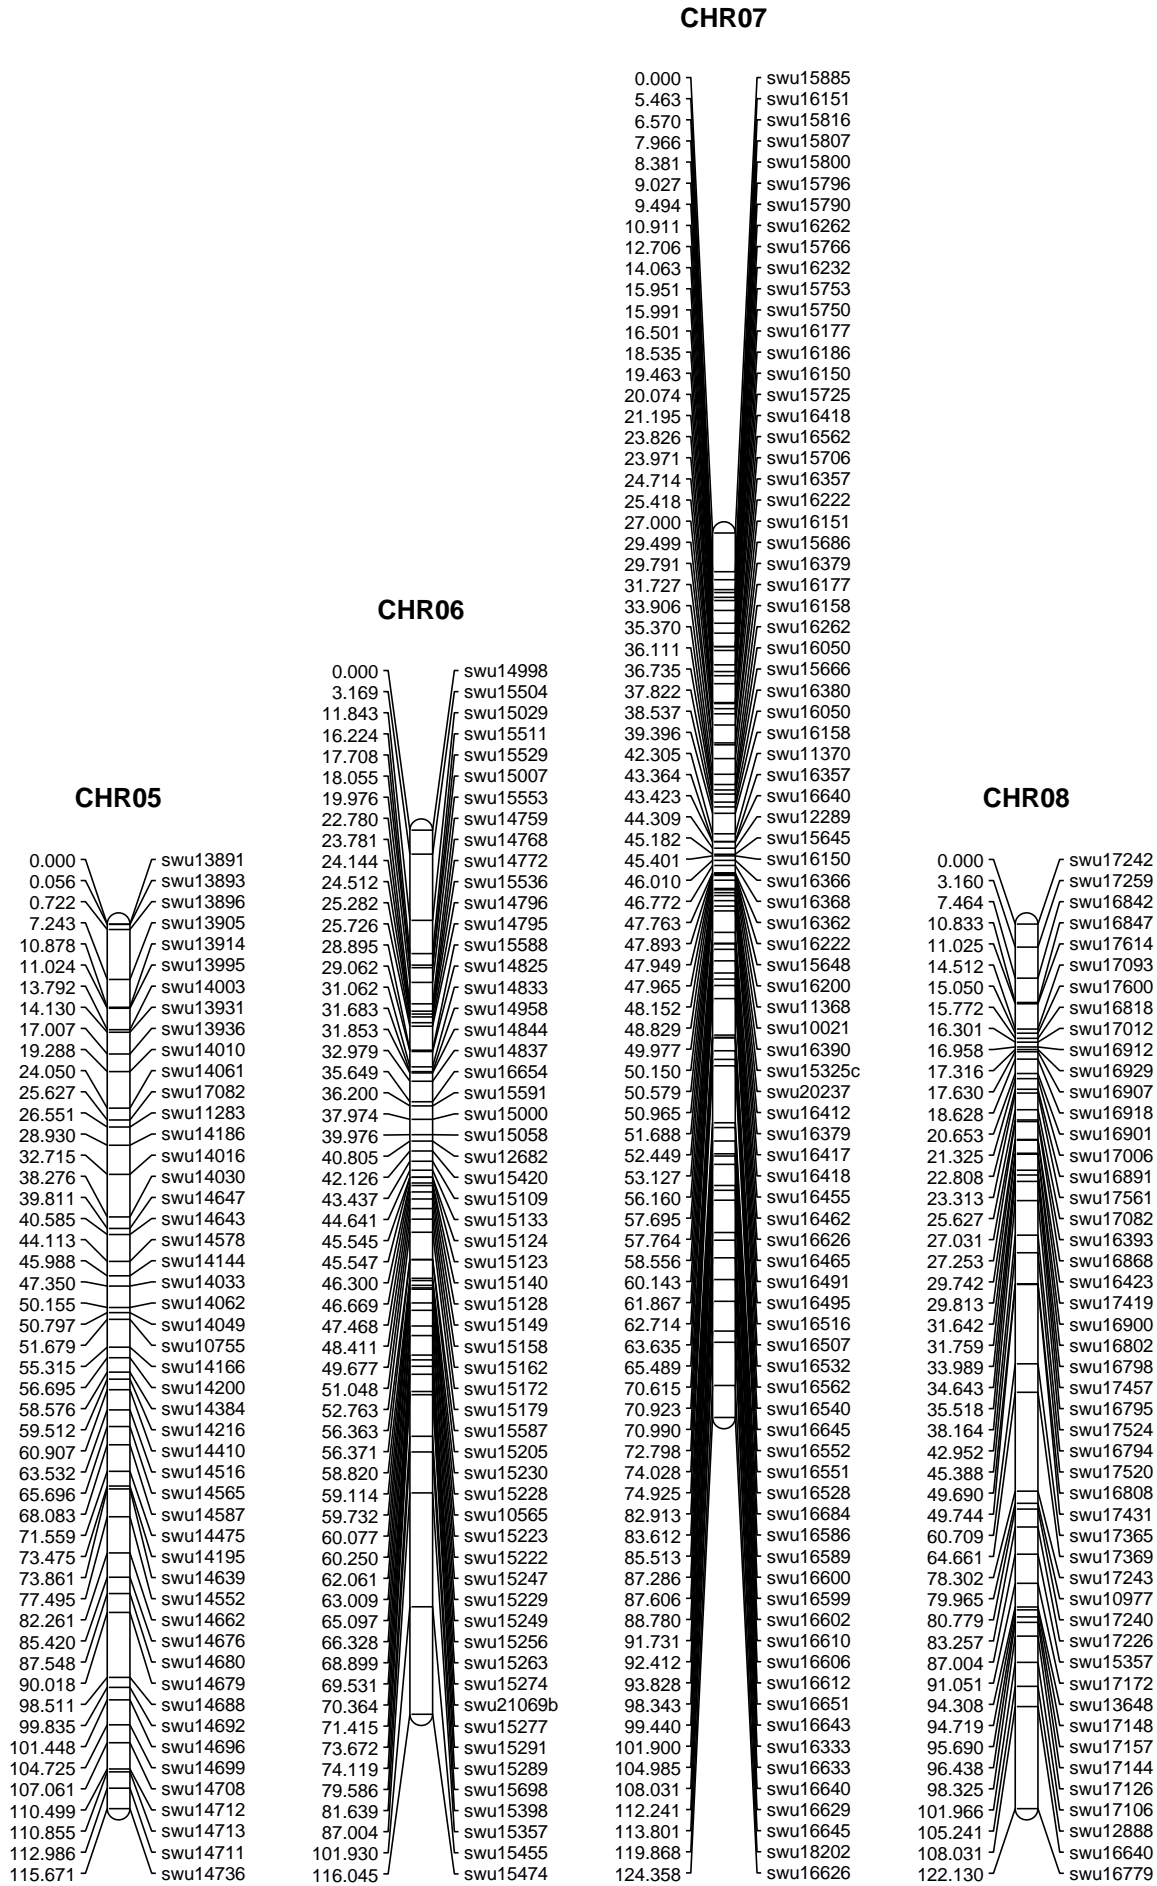

CHR09

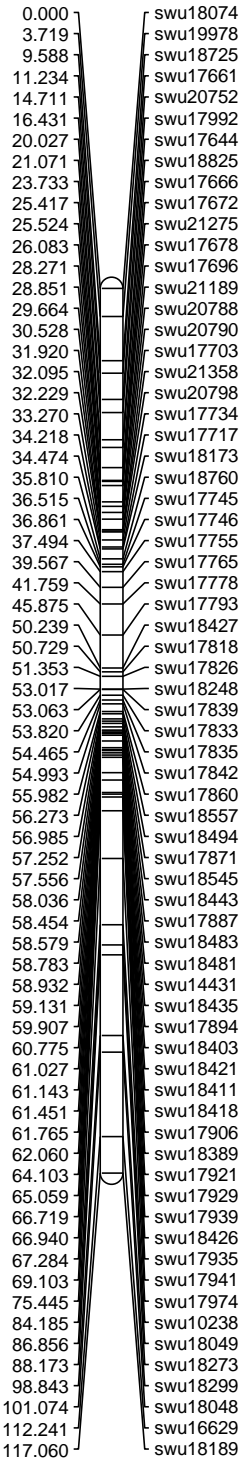

CHR11

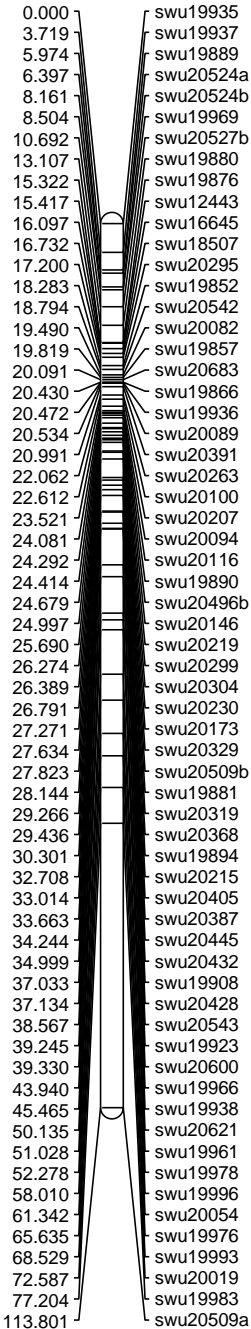

CHR10

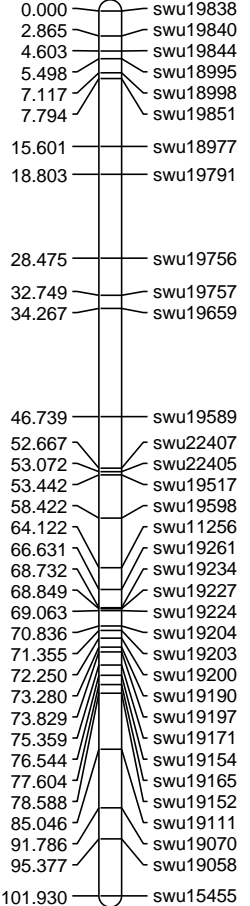

CHR12

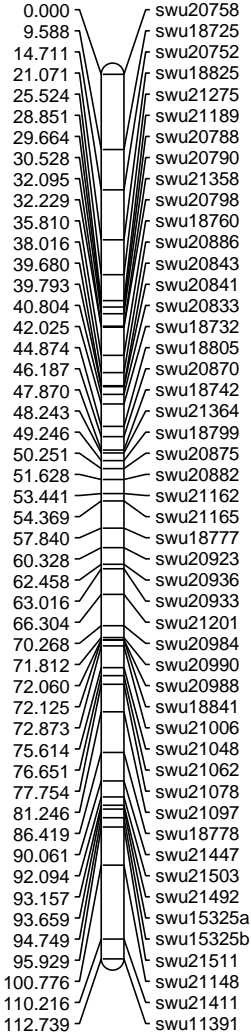

CHR13

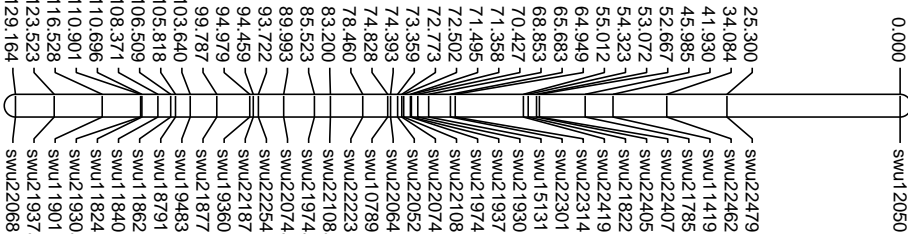

Supplement: s1 [file s1]
